# Supplementary material for: Association of Genetic Ancestry with Breast Cancer in Ethnically Diverse Women from Chicago
Source: PLoS One. 2014 Nov 25;9(11):e112916. doi: 10.1371/journal.pone.0112916 (PMC4244099; doi:10.1371/journal.pone.0112916)
Supplement: Table S3 — Association of Grade at diagnosis and ancestry. (XLSX) [file pone.0112916.s003.xlsx]

## Sheet: Grade
			African Americans									European Americans									Hispanic Americans
				Unadjusted				Adjusted					Unadjusted				Adjusted					Unadjusted				Adjusted
Chromosome	SNP	BP	MA	OR	L95	U95	P	OR	Lower	Upper	P	MA	OR	L95	U95	P	OR	L95	U95	P	MA	OR	L95	U95	P	OR	L95	U95	P
1	rs424436	8082678	C	1.465	0.6995	3.069	0.3113	1.505	0.6837	3.312	0.31	C	2.059	0.5329	7.958	0.295	2.964	0.5149	17.06	0.2238	C	1.064	0.5268	2.147	0.8635	1.399	0.4986	3.924	0.5237
1	rs7504	27238150	A	0.8437	0.5228	1.361	0.4862	0.9091	0.5456	1.515	0.7146	A	1.19	0.7107	1.992	0.5085	1.341	0.6839	2.631	0.3929	G	1.777	0.8326	3.794	0.1372	2.327	0.8496	6.375	0.1004
1	rs1931059	35366056	A	1.131	0.5947	2.153	0.7067	1.352	0.6629	2.757	0.407	A	1.019	0.6049	1.716	0.944	1.652	0.8381	3.257	0.1471	A	0.8227	0.4445	1.523	0.5343	1.156	0.4785	2.792	0.7476
1	rs10908316	35494810	T	0.8474	0.5435	1.321	0.465	0.785	0.4687	1.315	0.3575	G	0.9272	0.4796	1.792	0.8222	1.455	0.6129	3.455	0.3953	G	0.8831	0.4158	1.875	0.7463	1.115	0.4207	2.952	0.8273
1	rs2791966	36314861	C	1.064	0.6791	1.668	0.7859	1.182	0.7144	1.957	0.5145	T	0.7548	0.4459	1.278	0.295	0.5847	0.2763	1.237	0.1605	C	1.11	0.554	2.223	0.7689	0.8931	0.3734	2.136	0.7995
1	rs710232	42203154	T	1.142	0.7316	1.783	0.5587	1.426	0.8599	2.365	0.1691	C	1.24	0.6819	2.256	0.4804	1.268	0.5413	2.971	0.5844	C	0.9218	0.4636	1.833	0.8165	0.6356	0.231	1.749	0.3802
1	rs596985	64277035	T	0.8561	0.5681	1.29	0.4578	0.9559	0.5958	1.534	0.8516	C	0.3703	0.08482	1.617	0.1865	0.6834	0.1273	3.67	0.6571	C	0.8858	0.3799	2.065	0.7789	0.4884	0.1465	1.628	0.2433
1	rs855833	64357432	T	0.949	0.6088	1.479	0.8171	1.014	0.6025	1.708	0.9573	C	0.8672	0.523	1.438	0.5808	1.075	0.5719	2.021	0.8221	C	1.127	0.5736	2.215	0.7282	0.9779	0.3974	2.407	0.9613
1	rs17035850	117032022	A	0.876	0.5841	1.314	0.522	0.9815	0.6105	1.578	0.9386	T	0.4821	0.1024	2.271	0.3562	0.2956	0.03454	2.529	0.2658	T	1.126	0.4962	2.555	0.7766	0.7396	0.1344	4.071	0.7288
1	rs5025718	120478285	C	0.9473	0.5881	1.526	0.8237	0.8851	0.4945	1.584	0.681	T	0.917	0.5321	1.58	0.7551	0.936	0.4645	1.886	0.8533	T	1.038	0.5399	1.995	0.9113	0.9799	0.4041	2.376	0.9642
1	rs6695965	147060091	T	1.226	0.7923	1.898	0.36	1.452	0.8758	2.409	0.1482	C	1.111	0.6339	1.949	0.7122	1.237	0.6043	2.534	0.5601	T	0.5732	0.271	1.212	0.1453	0.5045	0.1954	1.302	0.1573
1	rs2274533	151395782	T	1.193	0.8053	1.767	0.379	1.187	0.7622	1.85	0.4477	T	1.216	0.7107	2.08	0.4758	1.067	0.527	2.16	0.8571	T	1.206	0.6857	2.12	0.5161	1.149	0.5448	2.423	0.7154
1	rs2814778	159174683	A	0.8931	0.5629	1.417	0.6312	1.088	0.5983	1.978	0.7826	G	1.336	0.4574	3.904	0.5962	1.607	0.1327	19.46	0.7094	G	1.464	0.6602	3.244	0.3484	1.382	0.2956	6.466	0.6807
1	rs12074150	173616907	G	1.168	0.7972	1.711	0.4255	1.144	0.7399	1.768	0.5455	G	NA	NA	NA	NA	NA	NA	NA	NA	G	1.426	0.3506	5.8	0.6201	NA	NA	NA	NA
1	rs2065160	204790977	C	1.14	0.7392	1.756	0.5542	1.049	0.6472	1.7	0.8461	C	1.236	0.6879	2.22	0.4789	0.9344	0.4123	2.117	0.8708	C	0.898	0.4794	1.682	0.7368	0.9077	0.3933	2.095	0.8206
1	rs6604611	216655251	C	1.129	0.7492	1.703	0.561	1.287	0.801	2.069	0.2968	A	1.078	0.5484	2.119	0.8274	1.312	0.5685	3.027	0.5247	A	1.709	0.782	3.737	0.179	2.237	0.8019	6.242	0.124
1	rs6698938	229985356	G	1.055	0.7057	1.576	0.795	1.037	0.6506	1.652	0.8793	G	0.9972	0.3588	2.771	0.9957	2.9	0.5221	16.11	0.2236	G	0.2459	0.05336	1.133	0.07192	0.2922	0.06023	1.417	0.1267
1	rs2502342	243070467	C	0.9527	0.6538	1.388	0.8007	0.9349	0.5983	1.461	0.7677	T	1.448	0.709	2.958	0.3095	1.334	0.5035	3.536	0.5619	T	1.066	0.4974	2.285	0.8694	0.732	0.206	2.601	0.6296
2	rs883399	9634100	A	0.8108	0.5579	1.178	0.2714	0.8455	0.5578	1.281	0.4288	G	1.005	0.655	1.543	0.9808	0.9474	0.5189	1.73	0.8604	A	1.113	0.6049	2.048	0.731	0.91	0.4234	1.956	0.809
2	rs300152	17986683	T	0.8194	0.5122	1.311	0.406	0.82	0.4894	1.374	0.451	T	1.905	1.076	3.373	0.02708	1.975	0.9262	4.213	0.07814	T	1.056	0.6038	1.846	0.8492	1.348	0.643	2.826	0.4291
2	rs2384319	26206255	G	1.01	0.5699	1.789	0.9735	0.9135	0.4938	1.69	0.773	G	0.9916	0.5398	1.821	0.9782	0.9629	0.4274	2.169	0.9273	G	1.204	0.5929	2.447	0.607	1.746	0.6884	4.427	0.2406
2	rs11124405	35188011	A	0.7998	0.5343	1.197	0.2778	0.8436	0.5337	1.334	0.4666	G	0.9407	0.5061	1.749	0.8468	0.8308	0.3531	1.955	0.6711	G	0.4174	0.1591	1.095	0.07594	0.1345	0.02703	0.6696	0.01429
2	rs13385952	41531398	T	0.8554	0.5698	1.284	0.451	0.8246	0.5118	1.329	0.4281	C	1.067	0.6273	1.815	0.8108	1.088	0.5129	2.308	0.8259	C	0.9557	0.4633	1.971	0.9023	0.9109	0.3638	2.281	0.8421
2	rs3768641	72368190	G	0.7794	0.4599	1.321	0.3543	0.7063	0.3775	1.321	0.2765	C	1.287	0.6702	2.473	0.4481	0.9791	0.3567	2.688	0.9674	C	0.9433	0.4704	1.891	0.8693	0.7668	0.2704	2.174	0.6174
2	rs1881244	73645089	G	0.6734	0.4232	1.072	0.09527	0.6785	0.3973	1.159	0.1554	A	0.8927	0.354	2.251	0.8099	0.4742	0.1133	1.985	0.3071	A	1.798	0.8315	3.886	0.136	2.833	1.001	8.018	0.04975
2	rs12714168	86331347	T	0.878	0.5399	1.428	0.6001	1.043	0.6005	1.81	0.8821	C	1.04	0.5767	1.875	0.8968	0.8189	0.3739	1.793	0.6173	C	1.373	0.7026	2.683	0.3537	1.209	0.5036	2.901	0.6713
2	rs6576989	97525099	T	0.8903	0.5369	1.476	0.6525	1.093	0.5947	2.009	0.7746	C	1.127	0.5488	2.313	0.7452	1.247	0.481	3.231	0.65	C	1.108	0.5007	2.453	0.7998	0.6129	0.209	1.797	0.3725
2	rs260714	109562495	C	0.7489	0.4587	1.223	0.2477	0.735	0.4173	1.295	0.2866	T	0.9776	0.5607	1.705	0.9363	1.286	0.5976	2.766	0.5205	C	0.6646	0.3684	1.199	0.1748	0.5441	0.2409	1.229	0.1431
2	rs951954	110459505	G	1.083	0.699	1.679	0.7205	1.107	0.6663	1.838	0.6952	A	0.6259	0.2679	1.462	0.279	0.818	0.2812	2.38	0.7123	A	0.6594	0.2462	1.765	0.4072	0.4947	0.1177	2.079	0.3366
2	rs901304	163416362	T	0.8196	0.4996	1.344	0.4307	0.6641	0.3841	1.148	0.1427	C	1.146	0.6686	1.964	0.6202	0.9046	0.4378	1.869	0.7865	C	1.447	0.7939	2.638	0.2276	1.791	0.834	3.844	0.1351
2	rs6748661	195682840	G	0.7961	0.4964	1.277	0.3441	0.8564	0.5108	1.436	0.5566	A	0.9391	0.5097	1.73	0.8403	0.507	0.1854	1.387	0.1859	A	1.32	0.6752	2.579	0.4172	1.788	0.7061	4.526	0.2203
3	rs11713766	398089	G	0.9412	0.5868	1.51	0.8016	0.9447	0.56	1.594	0.8313	A	1.328	0.6968	2.531	0.3885	1.49	0.5858	3.792	0.4022	A	1.387	0.6159	3.124	0.4295	1.547	0.43	5.568	0.5041
3	rs2470644	5776857	A	0.6212	0.4084	0.9449	0.02608	0.62	0.3788	1.015	0.0573	G	1.146	0.52	2.525	0.7356	1.305	0.4238	4.019	0.6428	G	1.993	0.9589	4.141	0.06467	2.355	0.9184	6.038	0.07463
3	rs2197896	30032530	T	0.8307	0.5491	1.257	0.3798	0.9386	0.5841	1.508	0.7934	C	1.134	0.4836	2.659	0.7724	0.9338	0.3168	2.753	0.9012	C	1.384	0.7533	2.541	0.2952	2.145	0.9528	4.83	0.06531
3	rs9311121	35928063	C	1.085	0.7297	1.612	0.6879	1.007	0.6464	1.567	0.977	T	0.9288	0.5424	1.591	0.788	0.8077	0.3918	1.665	0.563	T	0.8847	0.4432	1.766	0.7283	0.9004	0.371	2.185	0.8165
3	rs13069719	71506545	T	0.932	0.5974	1.454	0.7564	0.9374	0.584	1.505	0.789	T	1.063	0.6333	1.783	0.8184	0.845	0.4144	1.723	0.6431	T	0.4161	0.2164	0.8	0.008565	0.2995	0.1245	0.7207	0.007126
3	rs2660769	87080496	A	0.985	0.5749	1.688	0.956	1.049	0.5461	2.015	0.8855	G	0.9629	0.5749	1.613	0.8856	0.9605	0.4846	1.904	0.9081	G	1.672	0.8714	3.209	0.1221	1.71	0.789	3.705	0.1741
3	rs12489482	104579408	G	0.9694	0.6371	1.475	0.8845	0.9342	0.5533	1.577	0.7989	A	1.298	0.7391	2.281	0.3637	1.198	0.5459	2.628	0.6528	A	1.377	0.7176	2.641	0.3363	1.098	0.4334	2.782	0.8437
3	rs6437783	108172817	C	0.9243	0.59	1.448	0.7312	1.022	0.6238	1.675	0.9309	C	0.9684	0.5648	1.66	0.907	0.9393	0.4451	1.982	0.8696	C	1.784	0.9532	3.339	0.07029	3.198	1.365	7.495	0.007463
3	rs11714866	110067902	A	1.059	0.6411	1.751	0.8217	1.114	0.6398	1.939	0.7032	G	1.215	0.8434	1.75	0.296	1.437	0.8701	2.374	0.1566	A	0.9726	0.5521	1.713	0.9233	1.183	0.5827	2.401	0.6421
3	rs6772085	118584563	T	0.9785	0.6295	1.521	0.923	1.065	0.6385	1.778	0.8082	C	1.791	0.8423	3.807	0.13	0.8734	0.2398	3.18	0.8373	C	0.9449	0.42	2.126	0.8911	0.7895	0.2368	2.632	0.7005
3	rs2165139	139214470	T	0.4453	0.1701	1.166	0.09955	0.4314	0.1443	1.289	0.1324	T	1.562	0.7289	3.346	0.2516	2.744	0.9982	7.545	0.05042	T	0.8516	0.4539	1.598	0.6169	0.6635	0.2638	1.669	0.3834
3	rs6439896	139864353	T	0.771	0.5192	1.145	0.1975	0.8217	0.5229	1.291	0.3945	C	1.231	0.4669	3.248	0.6739	1.561	0.2283	10.67	0.65	C	1.372	0.5911	3.183	0.4619	1.309	0.4396	3.895	0.629
3	rs1439013	152581991	T	1.034	0.6572	1.627	0.8848	1.067	0.6486	1.754	0.7993	C	1.238	0.6972	2.2	0.4657	1.344	0.5954	3.033	0.4767	C	0.898	0.4369	1.846	0.7697	0.7441	0.2796	1.981	0.5541
3	rs9290363	168995107	T	0.6515	0.4074	1.042	0.07378	0.6888	0.3981	1.192	0.1827	G	0.9532	0.5567	1.632	0.8613	0.884	0.4168	1.875	0.748	G	1.353	0.7296	2.51	0.3372	1.396	0.6454	3.019	0.3967
4	rs10032047	63727833	G	1.21	0.7801	1.878	0.3944	1.455	0.8589	2.465	0.1632	A	1.072	0.6722	1.708	0.7712	1.121	0.6104	2.059	0.7124	A	0.9216	0.4977	1.706	0.7949	0.7367	0.3345	1.623	0.4481
4	rs7689609	72083374	T	1.094	0.6753	1.774	0.7141	1.187	0.6656	2.118	0.5611	C	0.6585	0.4016	1.08	0.09777	0.7562	0.3984	1.435	0.3927	C	0.8768	0.4728	1.626	0.6765	1.005	0.4681	2.157	0.9901
4	rs6446975	75036044	G	0.9947	0.6379	1.551	0.9813	1.131	0.648	1.976	0.664	A	1.375	0.724	2.611	0.3306	1.065	0.4355	2.603	0.8905	A	1.042	0.5226	2.08	0.906	1.016	0.4217	2.447	0.9721
4	rs7687935	82065566	A	0.8156	0.5103	1.304	0.3942	0.8641	0.5122	1.458	0.584	T	0.8546	0.5349	1.365	0.5111	0.9202	0.4842	1.749	0.7995	T	0.895	0.4755	1.685	0.731	0.8057	0.3544	1.832	0.6062
4	rs7662047	103091730	G	0.6401	0.4288	0.9555	0.02908	0.7536	0.4805	1.182	0.2181	A	1.323	0.5271	3.323	0.5508	0.7939	0.1877	3.359	0.7538	A	1.152	0.4703	2.822	0.7567	1.907	0.5124	7.098	0.3357
4	rs7657799	105375423	T	0.8555	0.5569	1.314	0.4763	0.9943	0.6146	1.609	0.9815	G	1.376	0.6154	3.078	0.4367	1.04	0.3123	3.465	0.9486	G	0.9297	0.3697	2.338	0.8768	0.5756	0.1482	2.235	0.4249
4	rs13108157	151530763	C	1.003	0.6334	1.589	0.9894	1.113	0.6496	1.907	0.6968	T	0.7873	0.4114	1.507	0.4702	0.8998	0.3807	2.127	0.81	T	1.245	0.5943	2.608	0.5614	1.129	0.422	3.023	0.8085
4	rs6829588	165221971	G	0.7598	0.4843	1.192	0.232	0.7626	0.4556	1.276	0.3024	T	1.558	0.8554	2.837	0.1473	1.283	0.5295	3.107	0.5813	T	1.332	0.684	2.592	0.3995	1.405	0.6197	3.185	0.4155
4	rs2332031	171742958	T	0.8708	0.5426	1.398	0.5666	1.02	0.5623	1.85	0.9484	C	1.004	0.5086	1.98	0.9917	0.8861	0.3693	2.126	0.7866	C	1.157	0.6054	2.21	0.6594	1.184	0.5425	2.585	0.6714
5	rs814597	10468929	T	0.8391	0.5097	1.381	0.4904	0.8196	0.4832	1.39	0.4605	T	0.777	0.4114	1.468	0.4368	0.7047	0.3002	1.654	0.4216	T	1.185	0.6351	2.21	0.5943	1.64	0.7097	3.788	0.2472
5	rs463240	25845146	G	1.157	0.7108	1.882	0.5581	1.402	0.8044	2.444	0.2332	A	1.018	0.5473	1.893	0.9551	1.106	0.5	2.445	0.8039	A	0.815	0.3363	1.975	0.6507	0.5941	0.1865	1.893	0.3785
5	rs35395	33948589	C	1.063	0.7042	1.604	0.7722	1.042	0.659	1.647	0.8605	T	0.9891	0.2976	3.287	0.9857	1.187	0.1983	7.101	0.8512	C	1.784	0.9986	3.189	0.05054	1.946	0.8138	4.654	0.1344
5	rs16891982	33951693	G	0.5211	0.3006	0.9032	0.02019	0.5059	0.2599	0.9849	0.04498	C	1.992	0.9913	4.005	0.05295	1.499	0.5919	3.799	0.393	G	1.465	0.8319	2.58	0.186	1.571	0.6408	3.849	0.3237
5	rs10059859	59231307	C	0.7096	0.4618	1.09	0.1175	0.6136	0.3632	1.037	0.06802	T	1.666	0.944	2.939	0.07821	1.354	0.6292	2.913	0.4385	T	1.64	0.7745	3.472	0.1963	3.601	1.062	12.2	0.03968
5	rs1443985	119425507	A	1.051	0.643	1.717	0.843	1.141	0.6378	2.041	0.6567	G	0.9223	0.5449	1.561	0.7631	0.963	0.4742	1.955	0.9169	G	1.373	0.6992	2.698	0.3569	1.421	0.6051	3.337	0.42
5	rs4513684	147652085	A	1.279	0.8215	1.992	0.2758	1.483	0.8952	2.456	0.126	C	1.122	0.4229	2.975	0.8176	0.5248	0.07103	3.878	0.5276	C	2.275	1.042	4.967	0.03909	6.141	1.521	24.8	0.01081
5	rs1551765	153176578	T	0.9082	0.5992	1.376	0.6498	0.9265	0.5945	1.444	0.736	T	0.6901	0.3825	1.245	0.2178	0.7602	0.3684	1.569	0.4583	T	0.8355	0.4629	1.508	0.5509	0.9155	0.4487	1.868	0.8083
6	rs6909271	198379	T	0.9269	0.6014	1.429	0.7309	1.063	0.6408	1.762	0.8142	A	2.203	1.289	3.766	0.003879	1.979	1.003	3.906	0.04898	A	1.063	0.5643	2.002	0.8505	1.105	0.5155	2.369	0.7971
6	rs6459548	17482317	G	1.732	1.023	2.934	0.04102	2.494	1.328	4.683	0.004469	A	1.292	0.7211	2.316	0.3891	1.45	0.6436	3.268	0.3698	A	2	0.8947	4.469	0.09123	3.035	0.9246	9.962	0.06715
6	rs2497150	84847013	C	0.9079	0.5661	1.456	0.6887	0.9867	0.5882	1.655	0.9595	T	0.8918	0.4907	1.621	0.7072	0.6199	0.2701	1.423	0.2593	T	0.7759	0.3458	1.741	0.5383	0.4249	0.1432	1.261	0.1231
6	rs794672	95458317	G	0.8778	0.5601	1.376	0.5697	1.052	0.6086	1.82	0.855	A	0.7151	0.3675	1.392	0.3236	0.4954	0.1936	1.268	0.1429	A	0.5256	0.2347	1.177	0.118	0.3345	0.1179	0.9486	0.03947
6	rs218867	121398535	A	0.9441	0.5899	1.511	0.8107	1.017	0.5963	1.733	0.9519	G	0.6503	0.3654	1.157	0.1433	0.8444	0.3889	1.833	0.6689	A	2.865	1.451	5.659	0.002431	4.66	1.8	12.07	0.001521
7	rs7784684	40167762	G	1.002	0.6557	1.533	0.991	1.338	0.8135	2.201	0.2514	T	1.731	0.5759	5.202	0.3285	0.9234	0.1624	5.251	0.9284	T	0.7134	0.2682	1.898	0.4986	0.5663	0.1628	1.97	0.3713
7	rs10264353	43321077	A	0.8831	0.5245	1.487	0.6399	1.407	0.739	2.678	0.2988	G	0.8658	0.5293	1.416	0.5659	1.071	0.5663	2.027	0.8324	G	0.7928	0.4287	1.466	0.4591	0.5907	0.2521	1.384	0.2256
7	rs10257477	107704688	T	1.208	0.8009	1.822	0.3676	1.31	0.8193	2.094	0.2594	C	0.9422	0.5249	1.691	0.8418	1.018	0.4822	2.148	0.9633	C	1.042	0.5226	2.08	0.906	0.6609	0.2405	1.816	0.422
7	rs4727700	107807083	A	1.263	0.7718	2.065	0.3532	1.335	0.7793	2.288	0.2926	T	1.136	0.6597	1.955	0.6463	1.137	0.5579	2.317	0.7239	T	2.155	0.92	5.048	0.07705	1.979	0.6957	5.628	0.2007
7	rs3094537	109554669	T	0.9512	0.6219	1.455	0.8176	1.113	0.6754	1.834	0.6743	C	1.091	0.3535	3.368	0.8795	1.045	0.1723	6.339	0.9617	C	0.7975	0.3494	1.821	0.5912	0.5055	0.1467	1.741	0.2797
7	rs2021782	132134995	A	1.031	0.6765	1.571	0.8873	1.103	0.6858	1.775	0.6855	G	1.025	0.5134	2.048	0.9435	0.6621	0.2125	2.063	0.477	G	0.9641	0.5031	1.847	0.9123	0.986	0.4468	2.176	0.9721
7	rs10954631	138539626	G	1.423	0.9092	2.229	0.1227	1.813	1.05	3.129	0.03276	A	2.394	1.25	4.587	0.008464	2.986	1.27	7.021	0.01217	A	1.454	0.7224	2.928	0.2941	1.781	0.6979	4.546	0.2272
8	rs6601288	8943430	A	0.8617	0.5353	1.387	0.5402	0.8428	0.5005	1.419	0.52	A	0.9938	0.6139	1.609	0.9798	0.9726	0.5395	1.753	0.9263	T	1.031	0.5558	1.911	0.9236	1.01	0.4439	2.299	0.9808
8	rs11778591	12720349	C	1.103	0.7294	1.668	0.6421	0.9106	0.5668	1.463	0.6988	C	1.114	0.5746	2.158	0.7499	1.384	0.5714	3.353	0.4714	A	1.824	0.963	3.456	0.06515	4.512	1.592	12.79	0.00459
8	rs2439522	97533766	G	0.8627	0.418	1.781	0.6895	0.7097	0.323	1.559	0.3933	G	0.9741	0.5176	1.833	0.9351	1.118	0.4904	2.55	0.7905	G	1.352	0.7277	2.513	0.3398	1.611	0.7551	3.435	0.2175
8	rs1871534	145639681	C	0.8227	0.5093	1.329	0.4253	0.855	0.495	1.477	0.5743	G	0.9754	0.448	2.124	0.9501	0.7031	0.2312	2.139	0.5349	G	0.9477	0.4122	2.179	0.8993	0.4092	0.1229	1.363	0.1455
9	rs12347078	344508	A	0.7501	0.4955	1.135	0.1739	0.8241	0.5179	1.311	0.4141	C	0.9246	0.4161	2.055	0.8474	0.8031	0.2382	2.707	0.7236	C	1	0.4447	2.249	1	0.8774	0.3159	2.437	0.8019
9	rs4478653	21853221	T	0.8299	0.5441	1.266	0.387	0.7399	0.4663	1.174	0.201	C	0.8174	0.5233	1.277	0.3755	0.7243	0.4204	1.248	0.2453	T	0.8587	0.4307	1.712	0.6653	0.7966	0.3477	1.825	0.5908
9	rs587364	125760863	C	0.6184	0.3592	1.065	0.08299	0.7398	0.3807	1.437	0.3739	T	0.8011	0.4333	1.481	0.4795	0.8704	0.3893	1.946	0.7353	T	0.5401	0.2853	1.022	0.0585	0.4428	0.1984	0.988	0.04664
10	rs10748592	94878355	T	1.093	0.7152	1.67	0.6814	1.008	0.6355	1.599	0.9727	T	0.9153	0.5531	1.515	0.7307	1.088	0.5375	2.203	0.8146	G	1.307	0.7384	2.312	0.3584	1.506	0.661	3.43	0.3299
11	rs6485600	12259702	G	1.077	0.6534	1.777	0.7702	1.071	0.6163	1.862	0.8069	A	1.143	0.6864	1.902	0.608	1.104	0.5508	2.213	0.7803	G	1.182	0.5939	2.352	0.6342	1.667	0.7034	3.949	0.2458
11	rs1638567	67125223	T	0.6801	0.4329	1.069	0.09454	0.7366	0.427	1.271	0.2718	C	0.953	0.4778	1.901	0.8913	1.145	0.4754	2.76	0.7621	C	1.265	0.6456	2.477	0.4937	1.511	0.6654	3.43	0.324
11	rs2458640	78035856	A	0.6533	0.4092	1.043	0.07441	0.6635	0.4016	1.096	0.1091	C	1.003	0.662	1.52	0.9884	1.109	0.6285	1.956	0.7215	A	1.583	0.8502	2.946	0.1476	1.674	0.7751	3.617	0.1896
11	rs533571	100850202	A	0.9729	0.5652	1.675	0.921	1.397	0.7341	2.659	0.3084	A	1.556	0.9443	2.565	0.08274	2.78	1.307	5.91	0.007896	G	1.559	0.8049	3.019	0.188	1.938	0.8168	4.596	0.1334
11	rs4936512	120155336	C	0.5512	0.3448	0.8812	0.01284	0.5944	0.3568	0.9901	0.04569	C	1.28	0.7957	2.061	0.3085	1.274	0.6717	2.417	0.4582	T	0.9184	0.5181	1.628	0.7706	0.8397	0.4206	1.677	0.6205
11	rs1648180	128049402	A	0.9877	0.6374	1.531	0.9559	0.8942	0.5481	1.459	0.6543	A	1.139	0.6928	1.871	0.6084	1.305	0.6667	2.556	0.4369	G	0.8774	0.4744	1.623	0.6767	0.7307	0.3235	1.65	0.4504
12	rs2293048	117664825	T	1.037	0.684	1.571	0.8652	1.026	0.628	1.675	0.9192	T	1.429	0.7391	2.763	0.2886	1.055	0.3834	2.904	0.9171	T	1.547	0.8641	2.769	0.142	2.148	1.03	4.483	0.04156
13	rs2065982	34864240	C	0.8627	0.418	1.781	0.6895	1.244	0.5596	2.768	0.5917	C	2.468	1.125	5.415	0.02421	3.06	1.033	9.063	0.04351	C	0.936	0.5042	1.738	0.8341	1.104	0.4785	2.548	0.8163
13	rs1540979	95090692	T	1.201	0.5364	2.688	0.6563	1.063	0.4196	2.693	0.8976	T	0.8706	0.4138	1.831	0.7149	0.7612	0.2907	1.993	0.5785	T	1.041	0.5566	1.946	0.9002	1.194	0.5383	2.647	0.6631
14	rs730570	101142890	A	0.9164	0.5937	1.415	0.6935	1.043	0.6464	1.684	0.8618	G	1.405	0.7981	2.472	0.2387	1.636	0.7592	3.525	0.2089	A	0.9338	0.498	1.751	0.8309	0.9229	0.4312	1.975	0.8362
15	rs2714758	25479337	A	0.765	0.4898	1.195	0.239	0.8852	0.5367	1.46	0.633	G	1.694	0.7835	3.664	0.1803	0.7884	0.1957	3.177	0.7381	G	0.9064	0.4246	1.935	0.7996	0.7327	0.2552	2.103	0.5633
15	rs1129038	28356859	A	0.6532	0.3517	1.213	0.1777	0.8567	0.4168	1.761	0.674	G	0.939	0.5902	1.494	0.7906	0.7124	0.3716	1.366	0.3071	A	1.554	0.7017	3.44	0.2773	1.997	0.7322	5.448	0.1767
15	rs1426654	48426484	A	1.148	0.7393	1.782	0.5389	1.104	0.6672	1.825	0.701	G	1.05	0.4647	2.373	0.9062	1.109	0.3293	3.734	0.8675	G	0.5772	0.2843	1.172	0.1282	0.3999	0.1442	1.109	0.07828
15	rs11073967	91565804	A	0.8506	0.4974	1.454	0.5542	0.9312	0.5014	1.73	0.8216	G	1.214	0.7699	1.914	0.4039	1.018	0.5619	1.845	0.9524	A	0.9175	0.4382	1.921	0.8193	0.6582	0.2441	1.775	0.4085
16	rs9937955	10950526	A	1.293	0.8614	1.942	0.2147	1.262	0.8081	1.969	0.3066	A	0.6176	0.3455	1.104	0.1039	0.3738	0.154	0.9072	0.02962	A	0.6304	0.3282	1.211	0.1661	0.4922	0.2104	1.152	0.1022
16	rs1557519	14251303	T	0.7544	0.4711	1.208	0.2406	0.8182	0.4827	1.387	0.456	C	0.9614	0.5295	1.745	0.897	0.935	0.4173	2.095	0.8702	C	0.9766	0.4737	2.013	0.9489	0.8248	0.3255	2.09	0.6848
23	rs992864	33796891	G	1.296	0.8217	2.043	0.2649	1.292	0.7452	2.241	0.3613	A	0.411	0.1385	1.22	0.1091	0.1766	0.02099	1.486	0.1106	A	0.5725	0.2268	1.445	0.2377	0.4302	0.1198	1.544	0.1958
23	rs1867024	147980413	A	0.8039	0.515	1.255	0.3368	0.897	0.5389	1.493	0.6758	G	0.8361	0.3661	1.909	0.671	0.5769	0.1592	2.09	0.4023	G	0.5375	0.2356	1.226	0.1401	0.2958	0.09412	0.9296	0.03707
