# Supplementary material for: Association of Genetic Ancestry with Breast Cancer in Ethnically Diverse Women from Chicago
Source: PLoS One. 2014 Nov 25;9(11):e112916. doi: 10.1371/journal.pone.0112916 (PMC4244099; doi:10.1371/journal.pone.0112916)
Supplement: Table S5 — Association of ER_PR status and ancestry. (XLSX) [file pone.0112916.s005.xlsx]

## Sheet: ER_PR status
			African Americans									European Americans									Hispanic Americans
				Unadjusted				Adjusted					Unadjusted				Adjusted					Unadjusted				Adjusted
Chromosome	SNP	BP	MA	OR	L95	U95	P	OR	Lower	Upper	P	MA	OR	L95	U95	P	OR	L95	U95	P	MA	OR	L95	U95	P	OR	L95	U95	P
1	rs424436	8082678	C	0.694	0.3165	1.522	0.3619	0.6863	0.3041	1.549	0.3646	C	1.38	0.1676	11.37	0.7644	0.7621	0.0741	7.837	0.8192	C	0.8971	0.4269	1.885	0.7744	0.5897	0.1991	1.747	0.3406
1	rs7504	27238150	A	0.7878	0.463	1.341	0.3793	0.6781	0.3792	1.212	0.1901	A	2.726	1.143	6.501	0.02372	3.162	0.9935	10.06	0.05131	G	1.164	0.5417	2.5	0.6977	1.19	0.4462	3.172	0.7285
1	rs1931059	35366056	A	0.7663	0.3824	1.536	0.453	0.5906	0.2744	1.271	0.1782	A	0.6931	0.3596	1.336	0.2736	0.4891	0.2059	1.162	0.1051	A	1.77	0.877	3.574	0.111	2.001	0.8062	4.968	0.1348
1	rs10908316	35494810	T	1.269	0.7859	2.048	0.33	1.335	0.7667	2.325	0.3073	G	0.7358	0.3115	1.738	0.4842	0.2536	0.07768	0.8278	0.02302	G	1.444	0.6299	3.309	0.3856	1.431	0.5052	4.056	0.4997
1	rs2791966	36314861	C	1.634	0.9574	2.789	0.07183	1.676	0.9332	3.009	0.08393	T	1.346	0.6734	2.69	0.4004	1.382	0.5331	3.582	0.5057	C	0.636	0.3031	1.334	0.2314	0.6156	0.24	1.579	0.3127
1	rs710232	42203154	T	1.438	0.8791	2.352	0.1479	1.293	0.752	2.223	0.3528	C	1.187	0.5036	2.799	0.6948	0.9935	0.3013	3.276	0.9915	C	1.409	0.652	3.046	0.3831	2.274	0.7454	6.94	0.1488
1	rs596985	64277035	T	1.129	0.7328	1.741	0.5814	1.003	0.6076	1.656	0.9909	C	2.343	0.3151	17.43	0.4055	1.265	0.1166	13.72	0.8468	C	0.9867	0.4047	2.406	0.9765	1.552	0.4224	5.705	0.5078
1	rs855833	64357432	T	1.136	0.6988	1.848	0.6061	1.163	0.6536	2.069	0.6078	C	1.502	0.6959	3.241	0.3001	1.259	0.5103	3.104	0.6174	C	1.095	0.5151	2.33	0.8128	1.14	0.4181	3.108	0.7982
1	rs17035850	117032022	A	0.7724	0.5033	1.185	0.2371	0.7682	0.4608	1.281	0.312	T	1.534	0.1881	12.5	0.6895	1.045	0.1111	9.838	0.9691	T	1.416	0.5084	3.941	0.506	3.557	0.4196	30.15	0.2446
1	rs5025718	120478285	C	0.8617	0.5173	1.435	0.5675	0.9981	0.5345	1.864	0.9952	T	1.544	0.6721	3.545	0.3062	0.9642	0.3737	2.487	0.9398	T	1.116	0.5493	2.266	0.7622	1.216	0.461	3.207	0.6927
1	rs6695965	147060091	T	0.8286	0.517	1.328	0.4347	0.8644	0.5028	1.486	0.5982	C	1.115	0.4817	2.579	0.7998	1.045	0.3877	2.817	0.9305	T	1.55	0.6766	3.549	0.3002	1.993	0.6785	5.855	0.2097
1	rs2274533	151395782	T	1.218	0.7999	1.855	0.3576	1.181	0.7317	1.908	0.4951	T	0.9783	0.4443	2.154	0.9565	0.7693	0.2926	2.023	0.5948	T	0.8086	0.4411	1.482	0.4921	0.8891	0.4045	1.954	0.7698
1	rs2814778	159174683	A	0.952	0.5892	1.538	0.8407	0.9344	0.4937	1.769	0.835	G	1.325	0.2135	8.217	0.7628	0.4005	0.02062	7.777	0.5454	G	1.118	0.4366	2.861	0.8166	2.237	0.2519	19.87	0.4699
1	rs12074150	173616907	G	1.349	0.8686	2.097	0.1825	1.36	0.8339	2.219	0.2177	G	NA	NA	NA	NA	NA	NA	NA	NA	G	0.6667	0.1715	2.592	0.5584	NA	NA	NA	NA
1	rs2065160	204790977	C	0.7808	0.4883	1.249	0.3016	0.871	0.5114	1.484	0.6112	C	0.356	0.1768	0.7165	0.003802	0.3444	0.1345	0.882	0.0263	C	1.076	0.546	2.122	0.8319	1.189	0.4684	3.016	0.7161
1	rs6604611	216655251	C	0.7576	0.4852	1.183	0.222	0.616	0.359	1.057	0.07854	A	0.622	0.2747	1.408	0.2548	0.341	0.1242	0.9361	0.03679	A	0.8112	0.3474	1.894	0.6287	0.847	0.3052	2.35	0.7499
1	rs6698938	229985356	G	0.9021	0.5911	1.377	0.633	1.005	0.6125	1.651	0.9829	G	1.1	0.2559	4.73	0.898	0.1346	0.0159	1.14	0.06584	G	2.35	0.5103	10.82	0.2728	1.912	0.3259	11.22	0.4727
1	rs2502342	243070467	C	1.053	0.7072	1.567	0.8001	1.01	0.6333	1.611	0.9665	T	1.678	0.4993	5.64	0.4026	1.225	0.3025	4.959	0.7762	T	1.008	0.4484	2.264	0.9855	0.8	0.1994	3.21	0.753
2	rs883399	9634100	A	1.097	0.7364	1.635	0.6486	1.019	0.6538	1.588	0.9338	G	1.508	0.8099	2.809	0.1952	1.817	0.7426	4.444	0.1909	A	1.496	0.7351	3.044	0.2665	1.736	0.7234	4.168	0.2168
2	rs300152	17986683	T	0.8351	0.5189	1.344	0.4579	0.7533	0.4449	1.275	0.2916	T	1.338	0.5706	3.137	0.5031	1.25	0.4186	3.731	0.6894	T	0.8311	0.4562	1.514	0.5454	0.7258	0.3308	1.593	0.4243
2	rs2384319	26206255	G	0.9933	0.525	1.879	0.9835	1.044	0.5276	2.064	0.9024	G	0.7874	0.358	1.731	0.5521	0.7187	0.2488	2.076	0.5418	G	0.6208	0.2916	1.322	0.2163	0.5261	0.2008	1.379	0.1913
2	rs11124405	35188011	A	0.7768	0.506	1.193	0.2482	0.6157	0.3753	1.01	0.05473	G	0.7079	0.3312	1.513	0.3728	0.8324	0.287	2.415	0.7357	G	1.393	0.5699	3.404	0.4674	1.5	0.4461	5.042	0.5125
2	rs13385952	41531398	T	0.8358	0.5465	1.278	0.408	0.7549	0.4562	1.249	0.2739	C	1.105	0.5263	2.321	0.7917	0.6772	0.2429	1.888	0.4562	C	1.107	0.4987	2.459	0.8021	1.204	0.4402	3.291	0.7181
2	rs3768641	72368190	G	0.9164	0.5336	1.574	0.7516	0.7599	0.3951	1.461	0.4106	C	1.64	0.5947	4.524	0.3391	0.6136	0.1585	2.375	0.4794	C	1.278	0.5658	2.886	0.5554	1.517	0.4668	4.931	0.4882
2	rs1881244	73645089	G	1.376	0.8338	2.271	0.2117	1.292	0.7247	2.302	0.3854	A	1.11	0.3074	4.005	0.8738	2.639	0.2682	25.98	0.4055	A	1	0.4312	2.319	1	0.8445	0.3001	2.377	0.749
2	rs12714168	86331347	T	1.182	0.7061	1.977	0.5253	0.9695	0.5325	1.765	0.9193	C	1.027	0.4449	2.373	0.9495	1.391	0.4547	4.252	0.5632	C	0.3422	0.1664	0.7035	0.003543	0.1937	0.06965	0.5387	0.00166
2	rs6576989	97525099	T	1.113	0.6432	1.927	0.7013	0.9351	0.4777	1.83	0.8447	C	1.565	0.5076	4.828	0.4355	0.8821	0.2494	3.119	0.8456	C	0.6442	0.281	1.477	0.2989	0.7323	0.2498	2.147	0.5702
2	rs260714	109562495	C	1	0.5966	1.676	1	0.9537	0.523	1.739	0.877	T	1.302	0.5768	2.94	0.5251	0.792	0.2796	2.244	0.6607	C	1.165	0.624	2.175	0.6317	1.246	0.5609	2.769	0.5889
2	rs951954	110459505	G	1.164	0.7218	1.878	0.5331	1.337	0.7652	2.337	0.3076	A	6.159	0.806	47.07	0.07976	3.299	0.3941	27.62	0.2709	A	1.374	0.4738	3.982	0.5589	0.8004	0.1578	4.06	0.7881
2	rs901304	163416362	T	0.8268	0.4817	1.419	0.49	0.7704	0.426	1.393	0.3882	C	0.8964	0.4364	1.841	0.7658	1.2	0.4588	3.14	0.71	C	0.7658	0.4026	1.457	0.4162	0.7326	0.3332	1.611	0.4389
2	rs6748661	195682840	G	0.83	0.5083	1.355	0.4563	0.759	0.4405	1.308	0.3205	A	2.144	0.7468	6.157	0.1564	10.44	0.9331	116.8	0.05694	A	0.6972	0.341	1.426	0.323	0.5763	0.2213	1.501	0.2592
3	rs11713766	398089	G	1.387	0.8259	2.33	0.216	1.397	0.7939	2.459	0.2461	A	2.768	0.8004	9.574	0.1078	4.673	0.5556	39.3	0.1559	A	2.082	0.7273	5.96	0.1718	3.617	0.7256	18.03	0.1167
3	rs2470644	5776857	A	1.235	0.7906	1.928	0.3541	1.127	0.6727	1.887	0.6503	G	3.898	0.5265	28.86	0.1829	NA	NA	NA	NA	G	1.137	0.4751	2.721	0.7731	1.266	0.4398	3.646	0.6618
3	rs2197896	30032530	T	0.9372	0.6019	1.459	0.7741	0.8396	0.5044	1.398	0.5014	C	0.8742	0.277	2.758	0.8186	1.056	0.2376	4.698	0.9425	C	0.9552	0.4876	1.871	0.8937	0.688	0.3099	1.527	0.3581
3	rs9311121	35928063	C	1.273	0.8213	1.974	0.2802	1.386	0.8513	2.255	0.1895	T	4.164	1.038	16.71	0.04415	4.636	0.6436	33.39	0.1279	T	1.299	0.5812	2.903	0.5239	1.052	0.3879	2.853	0.9207
3	rs13069719	71506545	T	1.346	0.8198	2.209	0.2403	1.339	0.7891	2.273	0.2792	T	1.204	0.5782	2.509	0.6194	1.425	0.5279	3.845	0.4848	T	3.356	1.549	7.273	0.00215	7.442	2.254	24.56	0.0009871
3	rs2660769	87080496	A	1.017	0.5811	1.778	0.9542	0.8593	0.4256	1.735	0.6722	G	2.038	0.9163	4.534	0.08087	2.658	0.8665	8.155	0.08737	G	0.6524	0.3286	1.295	0.2224	0.5892	0.2594	1.338	0.2061
3	rs12489482	104579408	G	1.584	0.9863	2.543	0.05705	1.667	0.9306	2.987	0.08575	A	1.384	0.5747	3.334	0.4685	1.593	0.4776	5.313	0.4488	A	0.7209	0.3593	1.447	0.3571	0.6641	0.2433	1.813	0.4243
3	rs6437783	108172817	C	0.744	0.4616	1.199	0.2248	0.6534	0.3836	1.113	0.1172	C	0.7385	0.3712	1.469	0.3877	0.581	0.2301	1.467	0.2504	C	0.9661	0.5	1.867	0.9184	0.8272	0.3706	1.846	0.6432
3	rs11714866	110067902	A	1.204	0.7005	2.069	0.5019	1.342	0.734	2.452	0.3396	G	0.9303	0.5594	1.547	0.7806	0.8146	0.4178	1.589	0.5474	A	0.7419	0.3983	1.382	0.347	0.547	0.2455	1.219	0.1401
3	rs6772085	118584563	T	0.9349	0.5812	1.504	0.7815	0.715	0.4089	1.25	0.2394	C	1.556	0.4517	5.357	0.4837	NA	NA	NA	NA	C	1.546	0.6097	3.92	0.3587	1.25	0.3149	4.961	0.7511
3	rs2165139	139214470	T	1.323	0.4985	3.51	0.5742	1.488	0.4873	4.542	0.4854	T	1.576	0.4575	5.432	0.4708	0.8114	0.2093	3.146	0.7624	T	0.9844	0.4985	1.944	0.9638	1.113	0.4267	2.903	0.8268
3	rs6439896	139864353	T	0.6858	0.4479	1.05	0.08277	0.5796	0.349	0.9626	0.03511	C	2.492	0.334	18.59	0.3732	NA	NA	NA	NA	C	0.8099	0.345	1.901	0.6282	0.579	0.1886	1.777	0.3395
3	rs1439013	152581991	T	1.123	0.6843	1.844	0.6456	1.169	0.6781	2.016	0.5737	C	1.322	0.5736	3.049	0.512	1.508	0.4439	5.126	0.5101	C	0.8605	0.3952	1.874	0.7051	0.756	0.2762	2.069	0.5861
3	rs9290363	168995107	T	0.8054	0.4928	1.316	0.3876	0.7154	0.4013	1.276	0.2564	G	1.275	0.5782	2.811	0.5472	1.59	0.4929	5.128	0.4378	G	0.8482	0.4358	1.651	0.628	0.7556	0.3396	1.681	0.4922
4	rs10032047	63727833	G	1.008	0.6283	1.617	0.9735	0.9631	0.5514	1.682	0.8948	A	1.663	0.7908	3.496	0.1799	1.58	0.6055	4.125	0.3497	A	1.821	0.8606	3.853	0.117	2.14	0.8028	5.705	0.1283
4	rs7689609	72083374	T	1.027	0.6014	1.753	0.9228	1.083	0.5773	2.03	0.8045	C	1.6	0.806	3.176	0.1792	1.676	0.6857	4.097	0.2574	C	2.172	1.03	4.578	0.04158	2.388	0.9633	5.921	0.06022
4	rs6446975	75036044	G	1.239	0.7538	2.037	0.3979	1.076	0.5878	1.971	0.8118	A	0.9191	0.3823	2.21	0.8504	1.395	0.3579	5.441	0.6313	A	1.183	0.5502	2.544	0.667	1.035	0.406	2.637	0.9431
4	rs7687935	82065566	A	0.9324	0.5634	1.543	0.7855	0.8533	0.4839	1.505	0.5837	T	1.13	0.5971	2.137	0.7078	0.7744	0.3301	1.817	0.5568	T	1.123	0.5562	2.267	0.7465	1.278	0.5169	3.16	0.5952
4	rs7662047	103091730	G	1.506	0.9776	2.32	0.06328	1.57	0.956	2.579	0.07469	A	2.844	0.3791	21.33	0.3094	NA	NA	NA	NA	A	0.9856	0.3897	2.493	0.9756	0.6538	0.1687	2.534	0.5388
4	rs7657799	105375423	T	1.694	1.046	2.745	0.03227	1.778	1.025	3.084	0.04059	G	1.681	0.4034	7.005	0.4756	1.723	0.2028	14.65	0.6181	G	1.25	0.4657	3.356	0.6576	1.441	0.345	6.017	0.6166
4	rs13108157	151530763	C	0.9499	0.576	1.567	0.8405	0.9466	0.5279	1.697	0.8538	T	1.981	0.7182	5.465	0.1867	1.273	0.3679	4.401	0.7034	T	1.134	0.5035	2.555	0.7613	1.003	0.342	2.944	0.995
4	rs6829588	165221971	G	1.824	1.092	3.047	0.02174	1.911	1.054	3.467	0.03302	T	1.431	0.5444	3.762	0.4673	0.5669	0.1666	1.93	0.3638	T	0.9296	0.4406	1.961	0.8481	1.065	0.4224	2.684	0.8943
4	rs2332031	171742958	T	1.19	0.7072	2.002	0.5125	1.124	0.5869	2.152	0.7246	C	0.7678	0.3206	1.839	0.5532	0.5654	0.1914	1.671	0.3023	C	0.6476	0.3217	1.303	0.2234	0.5027	0.2161	1.17	0.1104
5	rs814597	10468929	T	0.9968	0.5872	1.692	0.9907	0.9373	0.5352	1.642	0.8209	T	0.8469	0.3906	1.836	0.6739	1.036	0.379	2.832	0.9451	T	1.458	0.6997	3.038	0.3142	1.617	0.6562	3.985	0.2962
5	rs463240	25845146	G	0.9125	0.5399	1.542	0.7323	0.8246	0.4532	1.5	0.5278	A	1.636	0.6323	4.232	0.3102	2.443	0.63	9.472	0.1964	A	1.665	0.6237	4.445	0.3088	1.963	0.5671	6.792	0.2871
5	rs35395	33948589	C	1.009	0.651	1.564	0.968	0.9458	0.5821	1.537	0.8221	T	2.17	0.2931	16.07	0.4481	NA	NA	NA	NA	C	0.8662	0.4714	1.592	0.6436	0.9009	0.3575	2.27	0.8249
5	rs16891982	33951693	G	1.171	0.6649	2.061	0.5852	1.05	0.5189	2.124	0.8924	C	1.669	0.5541	5.028	0.3625	1.055	0.2627	4.235	0.94	G	0.9786	0.5339	1.794	0.9443	1.054	0.4033	2.753	0.9149
5	rs10059859	59231307	C	0.8612	0.5457	1.359	0.5208	0.7248	0.4158	1.263	0.2562	T	0.7614	0.3475	1.668	0.4956	0.7559	0.2751	2.077	0.5874	T	0.5299	0.2415	1.163	0.1133	0.1973	0.05008	0.7777	0.02037
5	rs1443985	119425507	A	1.212	0.7141	2.057	0.4764	1.086	0.5768	2.046	0.7975	G	1.164	0.5763	2.35	0.6726	0.9065	0.3661	2.245	0.832	G	0.6754	0.3258	1.4	0.2912	0.5734	0.2236	1.47	0.247
5	rs4513684	147652085	A	1.387	0.8628	2.231	0.1767	1.296	0.7507	2.237	0.3521	C	1.104	0.2779	4.389	0.8878	NA	NA	NA	NA	C	1.079	0.4656	2.499	0.8599	0.8532	0.231	3.152	0.8118
5	rs1551765	153176578	T	0.7055	0.4529	1.099	0.1229	0.6578	0.4089	1.058	0.08426	T	0.6912	0.3489	1.369	0.2896	1.111	0.4176	2.955	0.8331	T	1.418	0.7397	2.717	0.2931	1.217	0.5566	2.662	0.6225
6	rs6909271	198379	T	1.28	0.7892	2.077	0.3169	0.9289	0.5247	1.645	0.8002	A	0.6114	0.308	1.214	0.1596	0.7243	0.3074	1.707	0.4607	A	0.9009	0.445	1.824	0.7717	0.9037	0.3821	2.138	0.8177
6	rs6459548	17482317	G	0.7916	0.4555	1.376	0.4073	0.7559	0.4043	1.413	0.3805	A	1.287	0.5667	2.923	0.5466	0.7843	0.2596	2.37	0.6667	A	1	0.4158	2.405	1	0.8645	0.2644	2.827	0.8096
6	rs2497150	84847013	C	1.008	0.6069	1.674	0.9757	1.055	0.6038	1.845	0.8498	T	1.88	0.7649	4.622	0.1688	1.983	0.5877	6.694	0.2698	T	1.537	0.6402	3.691	0.336	2.002	0.6398	6.262	0.2331
6	rs794672	95458317	G	0.7662	0.477	1.231	0.2706	0.5978	0.3243	1.102	0.0991	A	1.876	0.6573	5.356	0.2396	1.657	0.4647	5.912	0.4361	A	2.896	1.081	7.759	0.0344	5.216	1.463	18.59	0.01088
6	rs218867	121398535	A	0.9353	0.5657	1.546	0.7942	0.9232	0.5186	1.643	0.7858	G	3.791	1.396	10.29	0.008919	2.767	0.8301	9.225	0.09754	A	0.6345	0.3243	1.241	0.1839	0.6339	0.2794	1.438	0.2754
7	rs7784684	40167762	G	1.178	0.746	1.859	0.4825	1.037	0.6079	1.77	0.8929	T	1.438	0.2021	10.23	0.7169	0.6552	0.06716	6.392	0.716	T	2.646	0.6528	10.72	0.173	4.41	0.6426	30.26	0.1311
7	rs10264353	43321077	A	1.165	0.6675	2.032	0.5914	0.8292	0.4196	1.639	0.59	G	1.177	0.597	2.322	0.6374	0.9592	0.4016	2.291	0.9253	G	1.435	0.728	2.829	0.2968	1.687	0.6871	4.144	0.2538
7	rs10257477	107704688	T	1.37	0.8466	2.217	0.1999	1.276	0.7439	2.189	0.3758	C	5.986	0.8518	42.07	0.07207	3.454	0.4962	24.05	0.2105	C	1.406	0.5886	3.359	0.4431	1.642	0.4865	5.539	0.4244
7	rs4727700	107807083	A	1.188	0.6992	2.018	0.5243	1.178	0.6598	2.103	0.5797	T	0.383	0.1754	0.8363	0.01601	0.253	0.08252	0.7757	0.01621	T	1.48	0.604	3.627	0.3912	2.617	0.8355	8.198	0.09866
7	rs3094537	109554669	T	1.021	0.6491	1.606	0.928	0.9305	0.5462	1.585	0.791	C	0.8313	0.197	3.507	0.8013	0.837	0.08127	8.62	0.8811	C	1.518	0.5743	4.014	0.3999	1.791	0.4495	7.134	0.4088
7	rs2021782	132134995	A	1.063	0.6802	1.662	0.7884	0.8876	0.5339	1.476	0.6457	G	1.011	0.3878	2.634	0.9826	1.704	0.3287	8.828	0.5257	G	0.7596	0.394	1.464	0.4116	0.5782	0.2639	1.267	0.1711
7	rs10954631	138539626	G	0.6974	0.4353	1.117	0.1341	0.637	0.3599	1.128	0.1217	A	0.2372	0.1097	0.5131	0.000257	0.09164	0.0273	0.3076	0.0001097	A	0.7653	0.3614	1.621	0.4848	0.4859	0.1818	1.299	0.1502
8	rs6601288	8943430	A	1.349	0.7975	2.282	0.2644	1.462	0.8249	2.593	0.1932	A	0.8732	0.4574	1.667	0.6811	0.9096	0.4176	1.981	0.8114	T	0.9719	0.5013	1.884	0.9327	0.9109	0.3932	2.11	0.8277
8	rs11778591	12720349	C	0.8096	0.5152	1.272	0.3597	0.7941	0.4774	1.321	0.3744	C	0.699	0.2915	1.676	0.4223	0.3356	0.1039	1.083	0.06785	A	0.6495	0.331	1.274	0.2096	0.2168	0.07155	0.6572	0.006892
8	rs2439522	97533766	G	0.5254	0.2541	1.086	0.08248	0.6354	0.2885	1.4	0.2604	G	1.445	0.5519	3.785	0.4534	2.006	0.5955	6.756	0.2613	G	1.012	0.5021	2.042	0.9724	1.02	0.4584	2.271	0.9607
8	rs1871534	145639681	C	0.9023	0.5388	1.511	0.696	0.928	0.5122	1.681	0.8055	G	2.624	0.6011	11.45	0.1995	1.109	0.2166	5.677	0.9013	G	1.219	0.4757	3.125	0.6798	1.898	0.5056	7.123	0.3425
9	rs12347078	344508	A	1.417	0.8933	2.248	0.1387	1.221	0.73	2.041	0.4472	C	0.9047	0.337	2.429	0.8425	0.4778	0.1358	1.682	0.25	C	1.109	0.4501	2.734	0.8217	1.2	0.4023	3.581	0.7436
9	rs4478653	21853221	T	0.8674	0.5636	1.335	0.5179	0.8528	0.53	1.372	0.5117	C	1.486	0.791	2.792	0.2182	1.687	0.7788	3.654	0.1848	T	1.748	0.7969	3.835	0.1634	2.229	0.8243	6.027	0.1143
9	rs587364	125760863	C	1.175	0.6622	2.084	0.5821	1.069	0.5204	2.196	0.8557	T	1.348	0.564	3.221	0.5018	1.568	0.4747	5.18	0.4606	T	1.609	0.8039	3.22	0.1792	1.715	0.7565	3.888	0.1964
10	rs10748592	94878355	T	1.127	0.7171	1.772	0.6036	1.196	0.7282	1.964	0.4796	T	1.9	0.8265	4.369	0.1307	1.982	0.6563	5.983	0.2251	G	0.7708	0.4076	1.458	0.4232	0.5772	0.2408	1.383	0.2178
11	rs6485600	12259702	G	0.9686	0.5612	1.672	0.9087	0.8392	0.4618	1.525	0.5653	A	1.715	0.8314	3.538	0.1442	2.238	0.8391	5.967	0.1075	G	0.5719	0.2639	1.239	0.1567	0.4212	0.16	1.109	0.08008
11	rs1638567	67125223	T	1.019	0.637	1.631	0.937	0.8715	0.495	1.535	0.6338	C	1.389	0.5041	3.829	0.5249	0.6183	0.1854	2.062	0.434	C	0.8857	0.4395	1.785	0.7343	0.67	0.2813	1.596	0.3658
11	rs2458640	78035856	A	1.399	0.8449	2.315	0.1921	1.336	0.7762	2.299	0.2958	C	1.353	0.7402	2.472	0.326	1.147	0.5082	2.588	0.7413	A	1.133	0.5737	2.237	0.7195	1.383	0.6252	3.057	0.4237
11	rs533571	100850202	A	1.023	0.5769	1.812	0.9392	0.7416	0.3776	1.456	0.3852	A	0.704	0.3622	1.369	0.3008	0.2477	0.08864	0.6921	0.007772	G	0.6369	0.3044	1.333	0.231	0.5105	0.209	1.247	0.14
11	rs4936512	120155336	C	0.906	0.5686	1.444	0.6779	0.8321	0.4909	1.41	0.4949	C	0.9175	0.4746	1.774	0.7979	0.5591	0.2361	1.324	0.1862	T	1.531	0.8138	2.879	0.1866	1.565	0.742	3.302	0.2394
11	rs1648180	128049402	A	0.6505	0.3999	1.058	0.08335	0.6601	0.3869	1.126	0.1275	A	0.656	0.3419	1.259	0.2048	0.4669	0.189	1.154	0.09887	G	1.203	0.6041	2.395	0.5992	1.559	0.6516	3.73	0.3184
12	rs2293048	117664825	T	1.425	0.9001	2.255	0.1309	1.586	0.9212	2.73	0.09611	T	0.7212	0.308	1.689	0.4515	1.607	0.3498	7.384	0.5419	T	0.6825	0.3636	1.281	0.2343	0.6172	0.2887	1.32	0.2133
13	rs2065982	34864240	C	1.645	0.7042	3.844	0.2501	1.229	0.4946	3.056	0.6566	C	0.656	0.2482	1.734	0.3953	0.6951	0.173	2.792	0.6082	C	0.579	0.3003	1.116	0.1027	0.3528	0.1347	0.9238	0.03389
13	rs1540979	95090692	T	0.5958	0.2589	1.371	0.2234	0.7687	0.2816	2.099	0.6077	T	1.891	0.6175	5.789	0.2646	3.223	0.6562	15.83	0.1496	T	0.9893	0.4965	1.971	0.9756	1.066	0.4513	2.518	0.8843
14	rs730570	101142890	A	1.318	0.8237	2.109	0.2495	1.311	0.7706	2.231	0.3177	G	1.369	0.5764	3.253	0.4766	1.396	0.4464	4.368	0.5661	A	1.197	0.608	2.355	0.6033	1.182	0.5226	2.674	0.6878
15	rs2714758	25479337	A	1.042	0.6566	1.653	0.8623	1.006	0.5898	1.717	0.9816	G	0.856	0.2978	2.46	0.7728	0.7704	0.1386	4.281	0.7656	G	1.028	0.4543	2.327	0.9467	0.9272	0.3033	2.835	0.8946
15	rs1129038	28356859	A	1.209	0.6271	2.331	0.5709	1.06	0.4857	2.313	0.8838	G	0.8571	0.4665	1.575	0.6194	0.8119	0.3502	1.882	0.6272	A	0.8442	0.3556	2.004	0.701	0.8636	0.3105	2.402	0.7788
15	rs1426654	48426484	A	1.002	0.6195	1.622	0.9924	0.9804	0.5684	1.691	0.9432	G	NA	NA	NA	NA	NA	NA	NA	NA	G	2.467	1.118	5.444	0.02539	5.03	1.418	17.84	0.01239
15	rs11073967	91565804	A	1.523	0.8325	2.785	0.1723	1.41	0.6925	2.87	0.3436	G	0.8258	0.4461	1.529	0.5425	1.42	0.621	3.247	0.4061	A	0.705	0.317	1.568	0.3914	0.9014	0.3205	2.535	0.844
16	rs9937955	10950526	A	1.112	0.7173	1.724	0.6351	1.111	0.6864	1.798	0.6685	A	1.281	0.5878	2.794	0.5329	2.097	0.6675	6.591	0.2048	A	1.309	0.6613	2.592	0.4394	1.966	0.7775	4.971	0.1532
16	rs1557519	14251303	T	1.362	0.8143	2.277	0.2393	1.326	0.7494	2.345	0.3327	C	0.8462	0.3812	1.878	0.6815	0.8147	0.272	2.44	0.7141	C	1.607	0.6889	3.748	0.2724	1.854	0.6467	5.318	0.2506
23	rs992864	33796891	G	0.7824	0.4867	1.258	0.3108	0.713	0.4007	1.269	0.2499	A	1.744	0.4017	7.574	0.4577	2.334	0.2454	22.19	0.4609	A	1.536	0.564	4.182	0.4012	1.57	0.4088	6.027	0.5113
23	rs1867024	147980413	A	1.352	0.8271	2.208	0.2292	1.137	0.6492	1.992	0.6529	G	1.856	0.4564	7.545	0.3877	1.055	0.2133	5.222	0.9473	G	1.181	0.5516	2.529	0.6683	1.404	0.4973	3.964	0.5217
